# Supplementary material
Source: PubMed Central journal article supplement (PMC8320498)
Supplement: jcsm.9098.ds001.pdf [file jcsm.9098.ds001.pdf]

**Table S1:** Summary of assessed OSA screening tools.

| <b>Clinical Screening Tool</b>                | <b>Description</b>                                                                                                                                                                                                                                                                                                                                                        | <b>Previously Validated Against PSG in an AF Cohort?</b>                                                                                                                                                                                                       |
|-----------------------------------------------|---------------------------------------------------------------------------------------------------------------------------------------------------------------------------------------------------------------------------------------------------------------------------------------------------------------------------------------------------------------------------|----------------------------------------------------------------------------------------------------------------------------------------------------------------------------------------------------------------------------------------------------------------|
| Level 1 Sleep Study (Polysomnography)         | Diagnostic montage of biological channels performed overnight in a laboratory setting; includes: EEG, EOG, EMG, ECG, airflow, air pressure, respiratory and abdominal effort, SaO <sub>2</sub> , HR, limb movement, snore probe, position sensor                                                                                                                          | Gold standard investigation                                                                                                                                                                                                                                    |
| Self-reported Snoring                         | Presence of snoring as reported by the patient or patient's bed partner                                                                                                                                                                                                                                                                                                   | No                                                                                                                                                                                                                                                             |
| Obesity                                       | BMI $\geq$ 30 kg/m <sup>2</sup>                                                                                                                                                                                                                                                                                                                                           | No                                                                                                                                                                                                                                                             |
| Modified Malampatti Score                     | Visual assessment of airway crowding performed with the patient sitting directly opposite the examiner, mouth open and tongue maximally protruded. Class 1: Faucial pillars, soft palate and uvula visible; Class II: Faucial pillars and soft palate visible. Uvula obscured by tongue; Class 3: Only the soft palate is visible; Class IV: Soft palate not visible (1). | No                                                                                                                                                                                                                                                             |
| Epworth Sleepiness Scale (ESS)                | Validated self-administered questionnaire of 8 questions in which the patient is asked to rank their usual chances of falling asleep or dozing in a series of daytime scenarios. Each question is subjectively scored from 0 -3, for a maximum overall score of 24, minimum of 0 (2). A score $\geq$ 11 indicates excessive daytime somnolence.                           | Yes, in on prospective cohort and one retrospective analysis of prospectively collected data. ESS very poorly predicted sleep disordered breathing for all levels of OSA severity (AUC: 0.48-0.56) (3), and moderate OSA only (AUC 0.50) (4).                  |
| Stop Bang Score                               | Validated questionnaire of 8 dichotomous variables related to OSA: snoring, tiredness, observed apnea, high BP, BMI, age, neck circumference and male gender. Score of 0-2 – low risk for moderate to severe OSA (AHI $\geq$ 15/hr), score of 5 – 8 = high risk of moderate to severe OSA (AHI $\geq$ 15/hr) (5).                                                         | Yes, with fair diagnostic accuracy for moderate OSA in one study (AUC 0.75, CI 0.66 – 0.86) (4).                                                                                                                                                               |
| Berlin questionnaire                          | Validated questionnaire assessing three domains: snoring, daytime somnolence or fatigue and obesity or hypertension. Positive responses in 2 out of 3 domains confer a “high risk” score (6).                                                                                                                                                                             | Yes, with poor diagnostic accuracy for moderate OSA only (AUC 0.64, CI 0.52 – 0.75) (4). Also assessed in small subsets of AF patients in two validation studies: (n=44), Sensitivity 86%, Specificity 89% (7), (n=30), Sensitivity 100%, Specificity 30% (8). |
| Level 3 sleep study, also known as polygraphy | Portable sleep study device including at least 4 channels, usually airflow, respiratory effort via thoracic band, oximetry and heart rate.                                                                                                                                                                                                                                | No                                                                                                                                                                                                                                                             |

| <b>Clinical Screening Tool</b>                              | <b>Description</b>                                                                                                                                            | <b>Previously Validated Against PSG in an AF Cohort?</b>                                                                                                                                                                                                                                                           |
|-------------------------------------------------------------|---------------------------------------------------------------------------------------------------------------------------------------------------------------|--------------------------------------------------------------------------------------------------------------------------------------------------------------------------------------------------------------------------------------------------------------------------------------------------------------------|
| Level 3 sleep study derived Apnoea Hypopnea Index (AHI)     | Number of apneas and hypopneas per hour of recording time. Scoring of events may be via automated software or can be manually scored by a trained technician. | No                                                                                                                                                                                                                                                                                                                 |
| Level 3 sleep study derived Oxygen desaturation Index (ODI) | Number of oxygen desaturations from baseline, usually a drop of $\geq 3\%$ .                                                                                  | No, ODI from a home-based test has not previously been assessed. ODI derived from laboratory PSG has previously been assessed in an AF cohort, with a 91% sensitivity and 83% specificity to detect moderate to severe OSA (AHI $\geq 15$ /hr) using a cut-off value of 4.1/hr, AUC 0.951, 95% CI: 0.929-0.972 (9) |

EEG: Electro-encephalogram, EOG: Electro-oculogram, EMG: Electromyogram, ECG: Electrocardiogram, AHI: Apnea Hypopnea Index, ODI: Oxygen Desaturation Index.

**Table S2:** Baseline characteristics of AF patients by recruitment stream (ER presentations vs PVI waitlist).

| Characteristic                                            | N (%) or Mean $\pm$ SD |                              |                        |          |
|-----------------------------------------------------------|------------------------|------------------------------|------------------------|----------|
|                                                           | Total<br>n = 107       | ED<br>presentation<br>n = 58 | PVI waitlist<br>n = 49 | p Value  |
| <b>General Demographics</b>                               |                        |                              |                        |          |
| Age (years)                                               | 61.3 $\pm$ 11.7        | 62.7 $\pm$ 12.5              | 59.7 $\pm$ 10.4        | 0.181    |
| Male                                                      | 70 (65.4)              | 33 (56.9)                    | 37 (75.5)              | 0.044*   |
| Ethnicity: Caucasian                                      | 99 (92.5)              | 53 (91.4%)                   | 46 (93.9%)             | 0.624    |
| <b>Phenotypic Characteristics</b>                         |                        |                              |                        |          |
| BMI (kg/m <sup>2</sup> )                                  | 27.2 $\pm$ 4.2         | 26.6 $\pm$ 4.0               | 27.8 $\pm$ 4.3         | 0.142    |
| Neck Circumference (cm), n = 105                          | 40.0 $\pm$ 4.7         | 39.2 $\pm$ 4.8               | 41.0 $\pm$ 4.5         | 0.050*   |
| Modified Malampatti Score (n=106)                         | 2.7 $\pm$ 0.9          | 2.7 $\pm$ 0.8                | 2.7 $\pm$ 0.9          | 0.761    |
| <b>OSA Symptoms</b>                                       |                        |                              |                        |          |
| ESS                                                       | 6.1 (3.4)              | 5.6 $\pm$ 3.5                | 6.4 $\pm$ 3.3          | 0.328    |
| Self-reported Snoring                                     | 69 (64.5)              | 35 (60.3)                    | 34 (69.4)              | 0.330    |
| <b>Co-morbidities/AF risk factors</b>                     |                        |                              |                        |          |
| Alcohol Excess ( $\geq$ 10 standard drinks/week), n = 105 | 26 (24.2)              | 12 (20.7)                    | 14 (28.6)              | 0.295    |
| Thyroid disease                                           | 17 (15.9)              | 11 (19.0)                    | 6 (12.2)               | 0.366    |
| Family history of AF                                      | 33 (30.8)              | 12 (20.7)                    | 21 (42.9)              | 0.033*   |
| Mod-severe MS/Prosthetic heart valve                      | 3 (2.8)                | 2 (3.4)                      | 1 (2.0)                | 0.660    |
| Hypertension                                              | 44 (41.1)              | 26 (44.8)                    | 18 (36.7)              | 0.397    |
| Diabetes                                                  | 5 (4.7)                | 1 (1.7)                      | 4 (8.2)                | 0.116    |
| IHD                                                       | 5 (4.7)                | 2 (3.4)                      | 3 (6.1)                | 0.514    |
| CCF                                                       | 18 (16.8)              | 11 (19.0)                    | 7 (14.3)               | 0.519    |
| Cerebrovascular Disease                                   | 2 (1.8)                | 0 (0)                        | 2 (4.1)                | 0.120    |
| Peripheral Vascular disease                               | 3 (2.8)                | 2 (3.4)                      | 1 (2.0)                | 0.660    |
| CHA <sub>2</sub> DS <sub>2</sub> -Vasc Score              | 1.6 $\pm$ 1.3          | 1.8 $\pm$ 1.3                | 1.4 $\pm$ 1.2          | 0.044*   |
| <b>AF characteristics</b>                                 |                        |                              |                        |          |
| Paroxysmal (cf persistent/permanent)                      | 102 (95.3)             | 55 (94.8)                    | 47 (95.9)              | 0.790    |
| Persistent/Permanent                                      | 5 (4.7)                | 3 (5.2)                      | 2 (4.1)                | 0.790    |
| High burden ( $\geq$ 10 episodes AF in the last 12M)      | 34 (31.8)              | 10 (17.2)                    | 24 (49.0)              | < 0.001* |
| Anti-arrhythmic therapy                                   | 88 (82.2)              | 48 (82.8)                    | 40 (81.6)              | 0.879    |
| Anti-coagulant therapy                                    | 87 (81.3)              | 46 (79.3)                    | 41 (83.7)              | 0.564    |
| <b>Echocardiographic parameters</b>                       |                        |                              |                        |          |
| Cardiac Ejection Fraction (%) (n=79)                      | 57.5 $\pm$ 8.6         | 56.6 $\pm$ 9.2               | 58.1 $\pm$ 7.9         | 0.429    |
| Left atrial diameter (cm) (n=57)                          | 4.1 $\pm$ 0.6          | 4.1 $\pm$ 0.7                | 4.1 $\pm$ 0.6          | 0.683    |
| Left atrial area (cm <sup>2</sup> ) (n=50)                | 24.3 $\pm$ 5.2         | 23.3 $\pm$ 4.1               | 25.1 $\pm$ 5.8         | 0.236    |
| <b>Questionnaires</b>                                     |                        |                              |                        |          |
| Berlin Questionnaire "high risk" (n=106)                  | 44 (41.5)              | 27 (46.6)                    | 17 (34.7)              | 0.282    |
| Stop Bang Questionnaire score                             | 3.5 $\pm$ 1.7          | 3.4 $\pm$ 1.7                | 3.7 $\pm$ 1.6          | 0.345    |
| <b>Sleep Parameters: all derived from PSG</b>             |                        |                              |                        |          |
| AHI                                                       | 13.5 $\pm$ 15.5        | 12.6 $\pm$ 13.2              | 14.4 $\pm$ 17.6        | 0.564    |

| Characteristic                       | N (%) or Mean $\pm$ SD |                              |                        |         |
|--------------------------------------|------------------------|------------------------------|------------------------|---------|
|                                      | Total<br>n = 107       | ED<br>presentation<br>n = 58 | PVI waitlist<br>n = 49 | p Value |
| ODI                                  | 7.1 $\pm$ 10.6         | 7.1 $\pm$ 10.8               | 7.1 $\pm$ 10.6         | 0.988   |
| CAI                                  | 0.6 $\pm$ 1.5          | 0.6 $\pm$ 1.5                | 0.5 $\pm$ 1.5          | 0.656   |
| Moderate to Severe OSA (AHI > 15/hr) | 33 (30.8)              | 18 (31.0)                    | 15 (30.1)              | 0.962   |

AHI: Apnea Hypopnea Index, BMI: Body Mass Index, CAI: Central Apnea Index, CCF: Congestive Cardiac Failure, ER: Emergency Room, ESS: Epworth Sleepiness Scale, IHD: Ischemic Heart Disease, MS: Mitral Stenosis, ODI: Oxygen desaturation index, PVI: Pulmonary Vein Isolation procedure waitlist, SD: Standard deviation.

**Table S3:** Baseline characteristics of AF patients with and without OSA (AHI  $\geq$  5/hr).

| Characteristic                                            | N (%) or Mean $\pm$ SD |                                             |                                               | p Value  |
|-----------------------------------------------------------|------------------------|---------------------------------------------|-----------------------------------------------|----------|
|                                                           | Total<br>(n = 107)     | OSA absent<br>(AHI < 5/h)<br>n = 40 (37.3%) | Any OSA<br>(AHI $\geq$ 5/h)<br>n = 67 (62.6%) |          |
| <b>General Demographics</b>                               |                        |                                             |                                               |          |
| Recruitment stream: ER                                    | 58 (54.2)              | 21 (52.5)                                   | 37 (55.2)                                     | 0.470    |
| Age (years)                                               | 61.3 $\pm$ 11.7        | 58.2 $\pm$ 13.0                             | 63.15 $\pm$ 10.5                              | 0.047*   |
| Male                                                      | 70 (65.4)              | 22 (55.0)                                   | 48 (71.6)                                     | 0.080    |
| Ethnicity: Caucasian                                      | 99 (92.5)              | 38 (95.0)                                   | 61 (91.0)                                     | 0.323    |
| <b>Phenotypic Characteristics</b>                         |                        |                                             |                                               |          |
| BMI (kg/m <sup>2</sup> )                                  | 27.2 $\pm$ 4.2         | 25.0 $\pm$ 3.5                              | 28.5 $\pm$ 4.0                                | < 0.001* |
| Neck Circumference (cm), n = 105                          | 40.0 $\pm$ 4.7         | 39.0 $\pm$ 4.5                              | 40.7 $\pm$ 4.8                                | 0.078    |
| Modified Malampatti Score (n=106)                         | 2.7 $\pm$ 0.9          | 2.4 $\pm$ 1.0                               | 2.9 $\pm$ 0.8                                 | 0.009*   |
| <b>OSA Symptoms</b>                                       |                        |                                             |                                               |          |
| ESS                                                       | 6.1 (3.4)              | 5.5 $\pm$ 3.8                               | 6.4 $\pm$ 3.2                                 | 0.195    |
| Self-reported Snoring                                     | 69 (64.5)              | 18 (45.0)                                   | 51 (76.2)                                     | 0.002*   |
| <b>Co-morbidities/AF risk factors</b>                     |                        |                                             |                                               |          |
| Alcohol Excess ( $\geq$ 10 standard drinks/week), n = 105 | 26 (24.2)              | 13 (32.5)                                   | 13 (23.6)                                     | 0.191    |
| Thyroid disease                                           | 17 (15.9)              | 12 (30.0)                                   | 5 (7.5)                                       | 0.003*   |
| Family history of AF                                      | 33 (30.8)              | 15 (37.5)                                   | 18 (26.9)                                     | 0.141    |
| Mod-severe MS/Prosthetic heart valve                      | 3 (2.8)                | 0 (0)                                       | 3 (4.5)                                       | 0.337    |
| Hypertension                                              | 44 (41.1)              | 10 (25.0)                                   | 34 (50.7)                                     | 0.009*   |
| Diabetes                                                  | 5 (4.7)                | 2 (5.0)                                     | 3 (4.5)                                       | 0.901    |
| IHD                                                       | 5 (4.7)                | 1 (2.5)                                     | 4 (6%)                                        | 0.411    |
| CCF                                                       | 18 (16.8)              | 5 (12.5)                                    | 13 (19%)                                      | 0.356    |
| Cerebrovascular Disease                                   | 2 (1.8)                | 0 (0)                                       | 2 (3.0)                                       | 0.27     |
| Peripheral Vascular disease                               | 3 (2.8)                | 3 (7.5)                                     | 0 (0)                                         | 0.023*   |
| CHA <sub>2</sub> DS <sub>2</sub> -Vasc Score              | 1.6 $\pm$ 1.3          | 1.4 $\pm$ 1.1                               | 1.8 $\pm$ 1.4                                 | 0.115    |
| <b>AF characteristics</b>                                 |                        |                                             |                                               |          |
| Paroxysmal                                                | 102 (95.3)             | 40 (100.0)                                  | 62 (92.5)                                     | 0.091    |
| Persistent/Permanent                                      | 5 (4.7)                | 0 (0)                                       | 5 (7.5)                                       | 0.091    |
| High burden ( $\geq$ 10 episodes AF in the last 12M)      | 34 (31.8)              | 9 (22.5)                                    | 25 (37.3)                                     | 0.111    |
| Anti-arrhythmic therapy                                   | 88 (82.2)              | 34 (85.0)                                   | 54 (80.6)                                     | 0.564    |
| Anti-coagulant therapy                                    | 87 (81.3)              | 33 (82.5)                                   | 54 (80.6)                                     | 0.807    |
| <b>Echocardiographic parameters</b>                       |                        |                                             |                                               |          |
| Cardiac Ejection Fraction (%) (n=79)                      | 57.5 $\pm$ 8.6         | 59.7 $\pm$ 5.7                              | 56.1 $\pm$ 9.7                                | 0.075    |
| Left atrial diameter (cm) (n=57)                          | 4.1 $\pm$ 0.6          | 4.0 $\pm$ 5.3                               | 4.2 $\pm$ 6.8                                 | 0.188    |
| Left atrial area (cm <sup>2</sup> ) (n=50)                | 24.3 $\pm$ 5.2         | 22.7 $\pm$ 4.9                              | 25.6 $\pm$ 5.2                                | 0.048*   |
| <b>Questionnaires</b>                                     |                        |                                             |                                               |          |
| Berlin Questionnaire "high risk" (n=106)                  | 44 (41.5)              | 8 (20.0)                                    | 36 (53.7)                                     | 0.002*   |
| Stop Bang Questionnaire                                   | 3.5 $\pm$ 1.7          | 2.8 $\pm$ 1.7                               | 4.0 $\pm$ 1.8                                 | 0.001*   |

| Characteristic                                | N (%) or Mean $\pm$ SD |                                             |                                               | p Value  |
|-----------------------------------------------|------------------------|---------------------------------------------|-----------------------------------------------|----------|
|                                               | Total<br>(n = 107)     | OSA absent<br>(AHI < 5/h)<br>n = 40 (37.3%) | Any OSA<br>(AHI $\geq$ 5/h)<br>n = 67 (62.6%) |          |
| <i>Sleep Parameters: all derived from PSG</i> |                        |                                             |                                               |          |
| AHI                                           | 13.5 $\pm$ 15.5        | 1.8 $\pm$ 1.4                               | 20.4 $\pm$ 15.8                               | < 0.001* |
| ODI                                           | 7.1 $\pm$ 10.6         | 0.6 $\pm$ 0.7                               | 11.0 $\pm$ 11.8                               | < 0.001* |
| CAI                                           | 0.6 $\pm$ 1.5          | 0.1                                         | 0.8                                           | 0.016*   |

AHI: Apnea Hypopnea Index, BMI: Body Mass Index, CAI: Central Apnea Index, CCF: Congestive Cardiac Failure, ER: Emergency Room, ESS: Epworth Sleepiness Scale, IHD: Ischemic Heart Disease, MS: Mitral Stenosis, ODI: Oxygen desaturation index, PVI: Pulmonary Vein Isolation procedure waitlist, SD: Standard deviation.

**Table S4:** Baseline characteristics of AF patients with and without severe OSA (AHI  $\geq$  30/hr).

| Characteristic                                            | N (%) or Mean $\pm$ SD |                      |                           |         |
|-----------------------------------------------------------|------------------------|----------------------|---------------------------|---------|
|                                                           | Total<br>(n = 107)     | AHI < 30/h<br>n = 94 | AHI $\geq$ 30/h<br>n = 13 | p Value |
| <b>General Demographics</b>                               |                        |                      |                           |         |
| Recruitment stream: ED                                    | 58 (54.2)              | 52 (55.3)            | 6 (46.1)                  | 0.371   |
| Age (years)                                               | 61.3 $\pm$ 11.7        | 61.2 $\pm$ 11.6      | 62.0 $\pm$ 12.4           | 0.823   |
| Male                                                      | 70 (65.4)              | 58 (61.7)            | 12 (92.3)                 | 0.024*  |
| Ethnicity: Caucasian                                      | 99 (92.5)              | 86 (91.5)            | 13 (100.0)                | 0.977   |
| <b>Phenotypic Characteristics</b>                         |                        |                      |                           |         |
| BMI (kg/m <sup>2</sup> )                                  | 27.2 $\pm$ 4.2         | 26.4 $\pm$ 3.6       | 32.8 $\pm$ 4.0            | <0.001* |
| Neck Circumference (cm), n = 105                          | 40.0 $\pm$ 4.7         | 39.3 $\pm$ 4.1       | 45.8 $\pm$ 5.5            | 0.002*  |
| Modified Malampatti Score (n=106)                         | 2.7 $\pm$ 0.9          | 2.6 $\pm$ 0.9        | 3.1 $\pm$ 0.6             | 0.085   |
| <b>OSA Symptoms</b>                                       |                        |                      |                           |         |
| ESS                                                       | 6.1 (3.4)              | 6.0 $\pm$ 3.5        | 6.5 $\pm$ 2.8             | 0.528   |
| Self-reported Snoring                                     | 69 (64.5)              | 59 (62.8)            | 10 (76.9)                 | 0.250   |
| <b>Co-morbidities/AF risk factors</b>                     |                        |                      |                           |         |
| Alcohol Excess ( $\geq$ 10 standard drinks/week), n = 105 | 26 (24.2)              | 23 (25.0)            | 3 (23.1)                  | 0.859   |
| Thyroid disease                                           | 17 (15.9)              | 16 (17.0)            | 1 (7.7)                   | 0.634   |
| Family history of AF                                      | 33 (30.8)              | 31 (33.0)            | 2 (1.5)                   | 0.089   |
| Mod-severe MS/Prosthetic heart valve                      | 3 (2.8)                | 2 (2.1)              | 1 (7.7)                   | 0.364   |
| Hypertension                                              | 44 (41.1)              | 35 (37.2)            | 9 (69.2)                  | 0.028*  |
| Diabetes                                                  | 5 (4.7)                | 4 (4.3)              | 1 (7.7)                   | 0.582   |
| IHD                                                       | 5 (4.7)                | 4 (4.3)              | 1 (7.7)                   | 0.582   |
| CCF                                                       | 18 (16.8)              | 13 (13.8)            | 5 (38.4)                  | 0.042*  |
| Cerebrovascular Disease                                   | 2 (1.8)                | 2 (2.1)              | 0 (0)                     | 0.771   |
| Peripheral Vascular disease                               | 3 (2.8)                | 3 (3.2)              | 0 (0)                     | 0.675   |
| CHA <sub>2</sub> DS <sub>2</sub> -Vasc Score              | 1.6 $\pm$ 1.3          | 1.6 $\pm$ 1.3        | 1.9 $\pm$ 1.2             | 0.341   |
| <b>AF characteristics</b>                                 |                        |                      |                           |         |
| Paroxysmal (cf persistent/permanent)                      | 102 (95.3)             | 92 (97.9)            | 10 (76.9)                 | 0.012*  |
| Persistent/Permanent                                      | 5 (4.7)                | 2 (2.1)              | 3 (23.1)                  | 0.012*  |
| High burden ( $\geq$ 10 episodes AF in the last 12M)      | 34 (31.8)              | 31 (33.0)            | 3 (23.0)                  | 0.074   |
| Anti-arrhythmic therapy                                   | 88 (82.2)              | 78 (83.0)            | 10 (76.9)                 | 0.416   |
| Anti-coagulant therapy                                    | 87 (81.3)              | 75 (79.8)            | 12 (92.3)                 | 0.252   |
| <b>Echocardiographic parameters</b>                       |                        |                      |                           |         |
| Cardiac Ejection Fraction (%) (n=79)                      | 57.5 $\pm$ 8.6         | 57.9 $\pm$ 8.2       | 54.5 $\pm$ 11.2           | 0.244   |
| Left atrial diameter (cm) (n=57)                          | 4.1 $\pm$ 0.6          | 4.0 $\pm$ 0.6        | 4.6 $\pm$ 0.7             | 0.014*  |
| Left atrial area (cm <sup>2</sup> ) (n=50)                | 24.3 $\pm$ 5.2         | 23.9 $\pm$ 5.0       | 28.4 $\pm$ 6.1            | 0.064   |
| <b>Questionnaires</b>                                     |                        |                      |                           |         |
| Berlin Questionnaire "high risk" (n=106)                  | 44 (41.5)              | 34 (36.2)            | 10 (76.9)                 | 0.020*  |
| Stop Bang Questionnaire                                   | 3.5 $\pm$ 1.7          | 3.8 $\pm$ 1.5        | 5.2 $\pm$ 1.6             | 0.001*  |
| <b>Sleep Parameters: all derived from PSG</b>             |                        |                      |                           |         |
| AHI                                                       | 13.5 $\pm$ 15.5        | 8.7 $\pm$ 7.9        | 47.7 $\pm$ 13.2           | <0.001* |

| Characteristic | N (%) or Mean $\pm$ SD |                      |                           |         |
|----------------|------------------------|----------------------|---------------------------|---------|
|                | Total<br>(n = 107)     | AHI < 30/h<br>n = 94 | AHI $\geq$ 30/h<br>n = 13 | p Value |
| ODI            | 7.1 $\pm$ 10.6         | 3.6 $\pm$ 4.2        | 32.3 $\pm$ 8.9            | <0.001* |
| CAI            | 0.6 $\pm$ 1.5          | 0.3 $\pm$ 0.9        | 2.3 $\pm$ 3.2             | <0.001* |

AHI: Apnea Hypopnea Index, BMI: Body Mass Index, CAI: Central Apnea Index, CCF: Congestive Cardiac Failure, ER: Emergency Department, ESS: Epworth Sleepiness Scale, IHD: Ischemic Heart Disease, MS: Mitral Stenosis, ODI: Oxygen desaturation index, PVI: Pulmonary Vein Isolation procedure waitlist, SD: Standard deviation



**Figure S1:** Patient-centered paired Visual Analogue Scales were used to evaluate the patient's subjective assessment of In-laboratory Polysomnography Vs a Level 3 Portable Sleep Study Device.

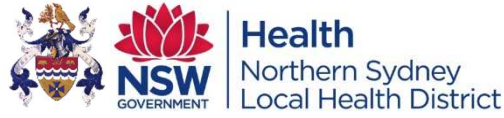

## Patient Feedback Form

**Please answer the following questions with regards to your in-hospital Sleep Study (Polysomnography):**

On a scale from 1 to 10, how **comfortable** did you find the in-hospital sleep study?

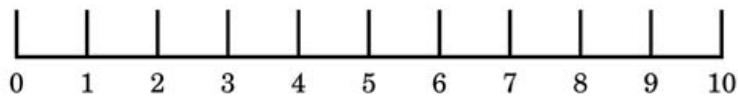

Not comfortable

Neutral

Very comfortable

On a scale from 1 to 10, how **convenient** did you find the in-hospital sleep study?

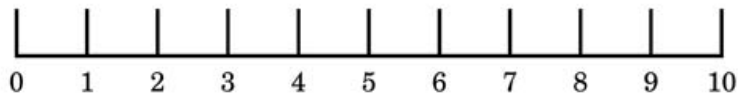

Not convenient

Neutral

Very convenient

On a scale from 1 to 10, how **closely** did your sleep pattern on the in-hospital study night match your normal sleep pattern at home?

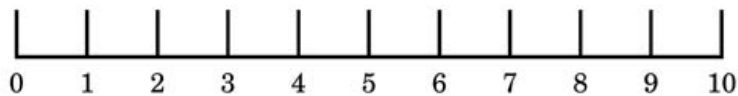

Not close to normal sleep

Neutral

Very close to normal sleep

On a scale from 1 to 10, how **confident** were you in the results from the in-hospital sleep study?

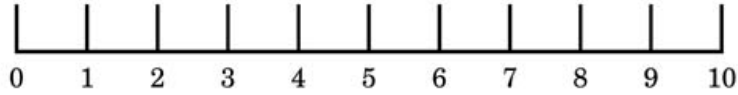

Not confident

Neutral

Very confident

**Please answer the following questions with regards to your at-home Sleep Study (ApneaLink):**

On a scale from 1 to 10, how **comfortable** did you find the at-home sleep study?

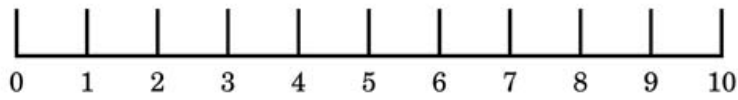

Not comfortable

Neutral

Very comfortable

On a scale from 1 to 10, how **convenient** did you find the at-home sleep study?

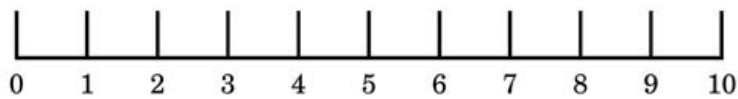

Not convenient

Neutral

Very convenient

On a scale from 1 to 10, how **closely** did your sleep pattern on the at-home study night match your normal sleep pattern at home?



Not close to normal sleep

Neutral

Very close to normal sleep

On a scale from 1 to 10, how **confident** were you in the results from the at- home sleep study?

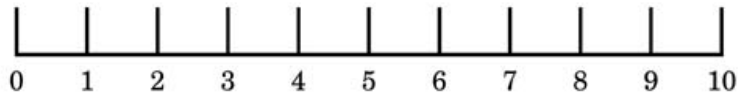

Not confident

Neutral

Very confident

**Overall, which sleep test did you prefer?**

In-hospital study (Polysomnography)

At-home study (ApneaLink)

Neither

Either

**Why?**

**Do you have any other comments?**

**Figure S2:** Bland Altman plot comparing PSG derived AHI with ApneaLink derived AHI.

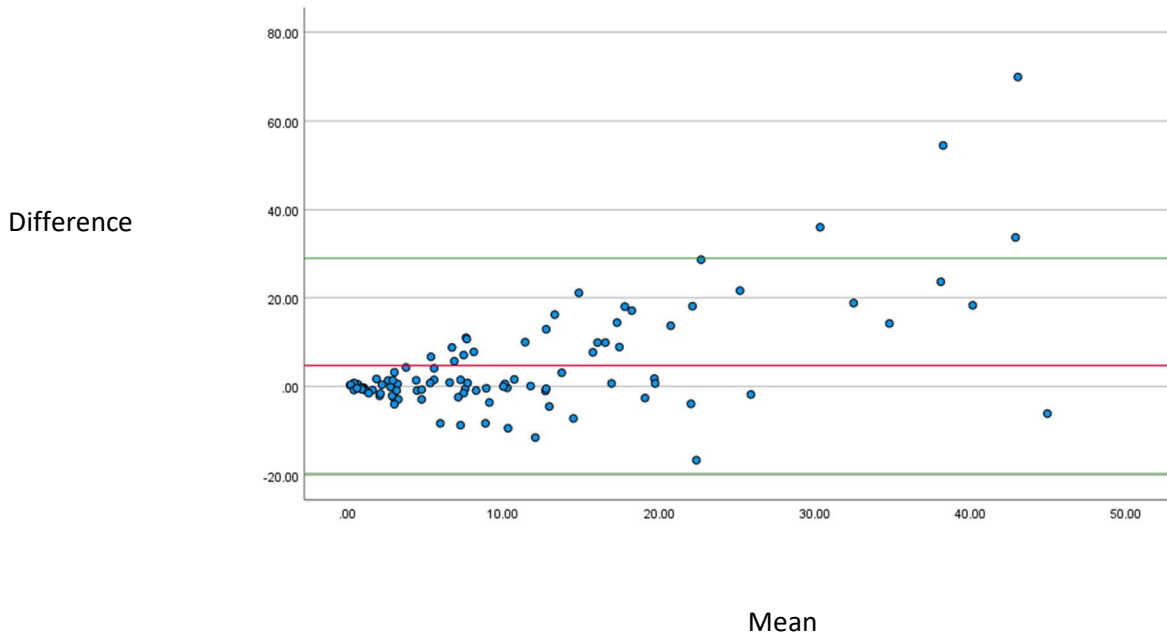

Red reference line: mean difference, Green reference lines: 95% confidence interval of mean difference upper and lower bounds. AHI: Apnea Hypopnea Index, PSG: polysomnography.

## SUPPLEMENTAL MATERIAL: REFERENCES

1. Samssoon GL, Young JR. Difficult tracheal intubation: a retrospective study. *Anaesthesia*. 1987;42(5):487-90.
2. Johns MW. A new method for measuring daytime sleepiness: the Epworth sleepiness scale. *Sleep*. 1991;14(6):540-5.
3. Kadhim K, Middeldorp ME, Elliott AD, Jones D, Hendriks JML, Gallagher C, et al. Self-Reported Daytime Sleepiness and Sleep-Disordered Breathing in Patients With Atrial Fibrillation: SNOozE-AF. *Can J Cardiol*. 2019;35(11):1457-64.
4. May AM, Wang L, Kwon DH, Van Wagoner DR, Chung MK, Dalton JE, et al. Sleep apnea screening instrument evaluation and novel model development and validation in the paroxysmal atrial fibrillation population. *IJC Heart & Vasculature* (Epub ahead of print) <https://doi.org/101016/jijcha2020100624>. 2020.
5. Chung F, Abdullah HR, Liao P. Stop-bang questionnaire: A practical approach to screen for obstructive sleep apnea. *Chest*. 2016;149(3):631-8.
6. Netzer NC, Stoohs RA, Netzer CM, Clark K, Strohl KP. Using the Berlin Questionnaire to identify patients at risk for the sleep apnea syndrome. *Ann Intern Med*. 1999;131(7):485-91.
7. Gami AS, Pressman G, Caples SM, Kanagala R, Gard JJ, Davison DE, et al. Association of atrial fibrillation and obstructive sleep apnea. *Circulation*. 2004;110(4):364-7.
8. Tang RB, Dong JZ, Liu XP, Kang JP, Ding SF, Wang L, et al. Obstructive sleep apnoea risk profile and the risk of recurrence of atrial fibrillation after catheter ablation. *Europace*. 2009;11(1):100-5.
9. Linz D, Kadhim K, Brooks AG, Elliott AD, Hendriks JML, Lau DH, et al. Diagnostic accuracy of overnight oximetry for the diagnosis of sleep-disordered breathing in atrial fibrillation patients. *Int J Cardiol*. 2018.
